# Supplementary material for: Modelling Arctic lower-tropospheric ozone: processes controlling seasonal variations
Source: Copernicus journal article supplement (doi:10.5194/acp-25-8355-2025), 2025-08-01
Supplement: Supplementary file 1 [file acp-25-8355-2025-supplement.pdf]

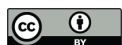

*Supplement of*

## **Modelling Arctic lower-tropospheric ozone: processes controlling seasonal variations**

**Wanmin Gong et al.**

*Correspondence to:* Wanmin Gong ([wanmin.gong@ec.gc.ca](mailto:wanmin.gong@ec.gc.ca))

The copyright of individual parts of the supplement might differ from the article licence.

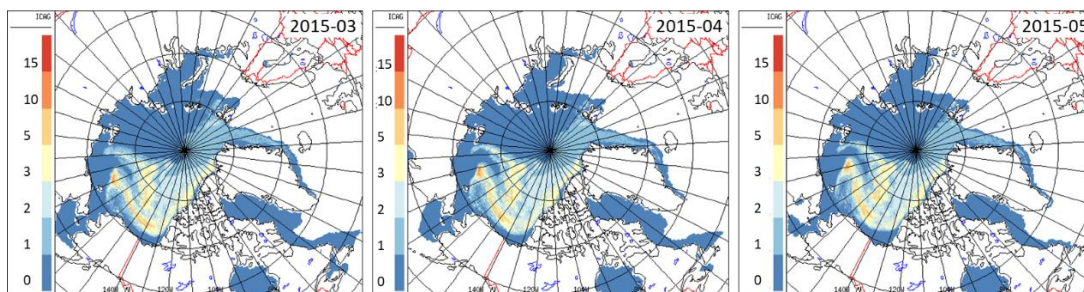

**Figure S1.** Monthly mean sea ice age (year), for March, April, and May 2015, from the EASE-Grid Sea Ice Age Version 4 dataset used by GEM-MACH.

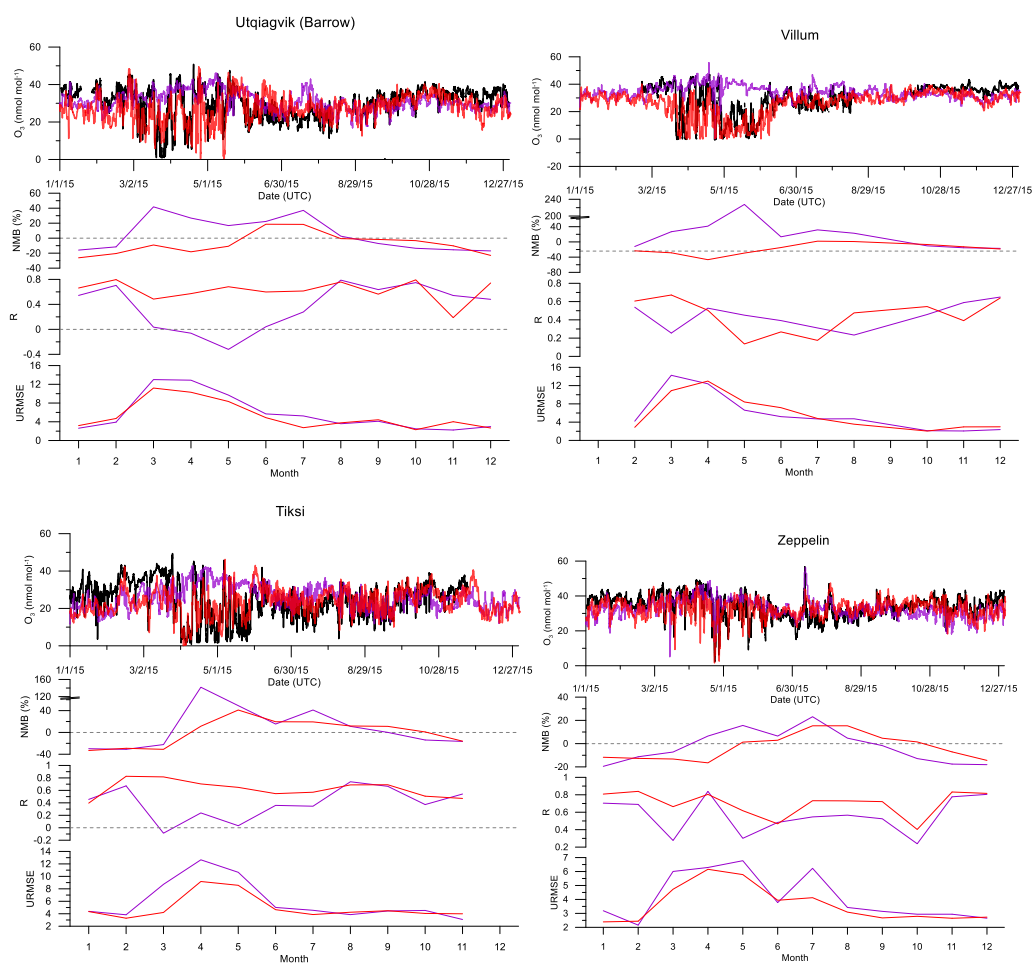

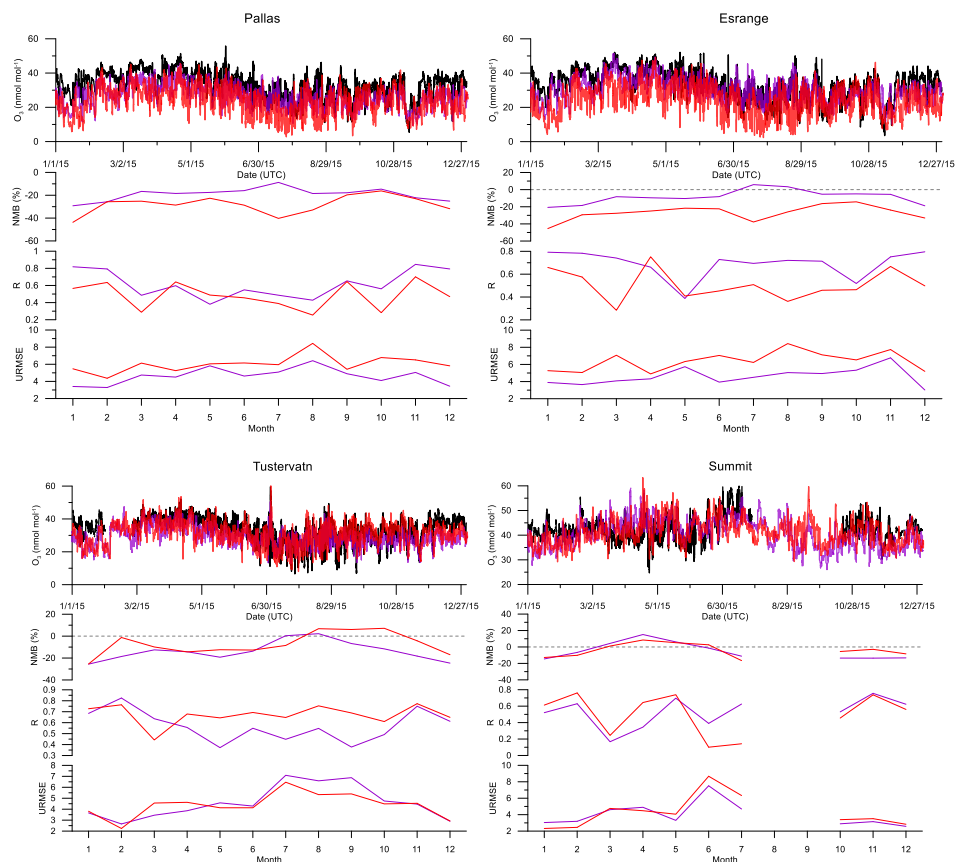

**Figure S2.** O<sub>3</sub> time series comparisons between models (GEM-MACH and DEHM) and observations at Arctic surface sites accompanied by monthly evaluation statistical metrics (NMB, R, URMSE).

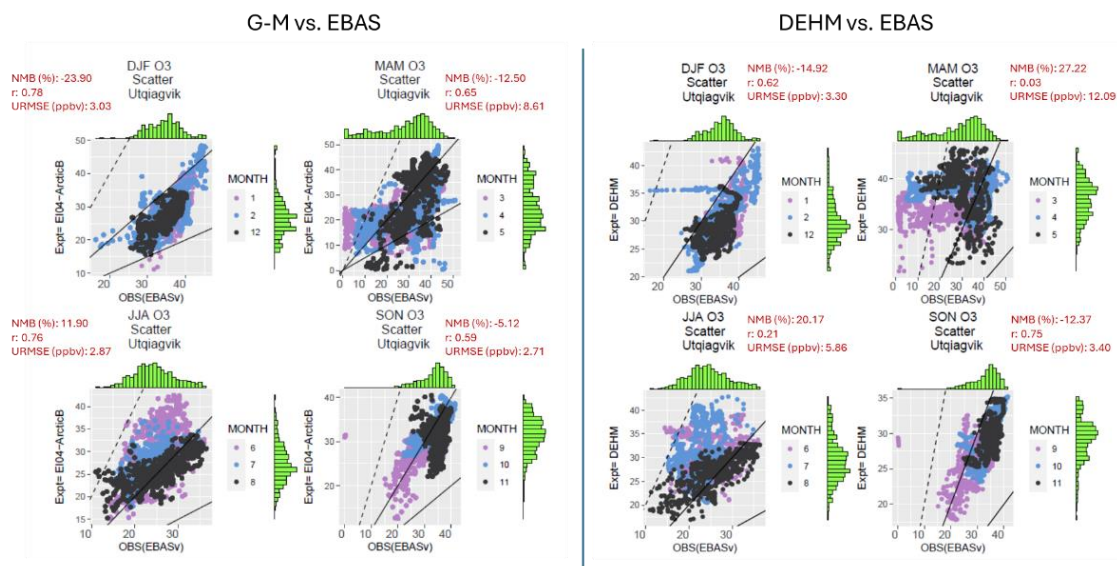

G-M vs. EBAS

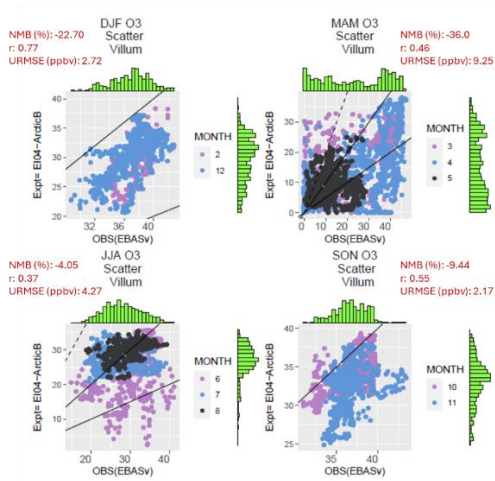

DEHM vs. EBAS

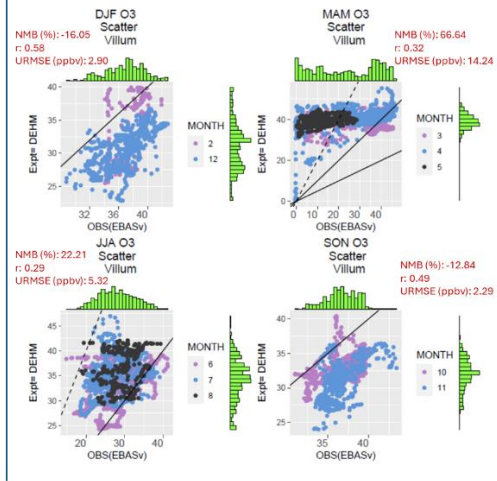

G-M vs. EBAS

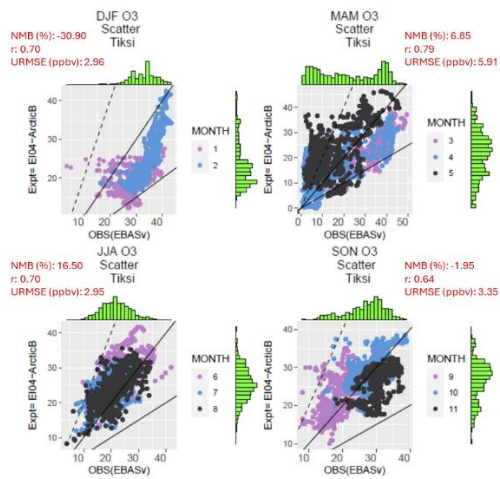

DEHM vs. EBAS

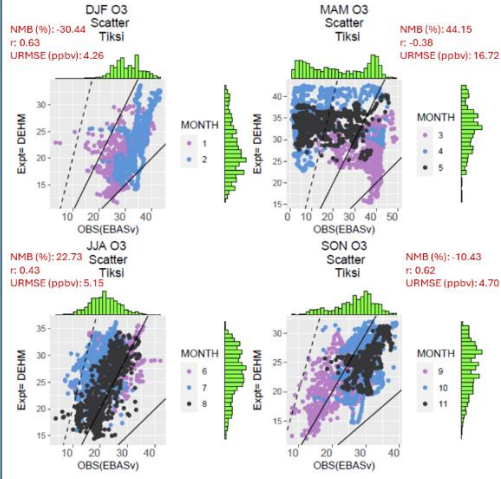

G-M vs. EBAS

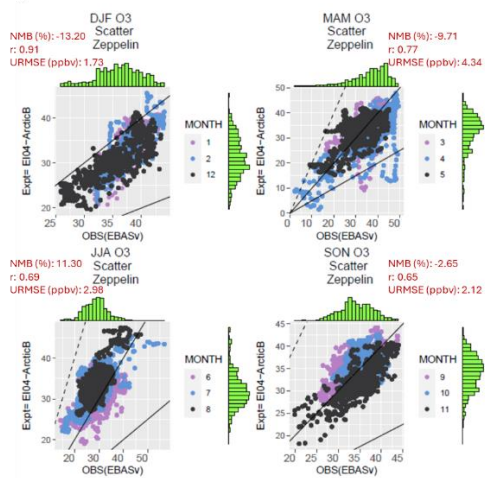

DEHM vs. EBAS

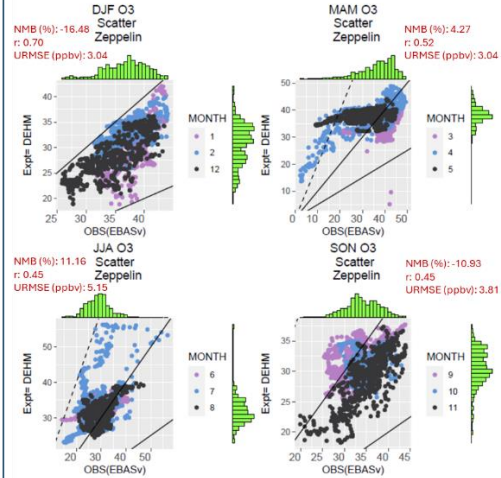



G-M vs. EBAS

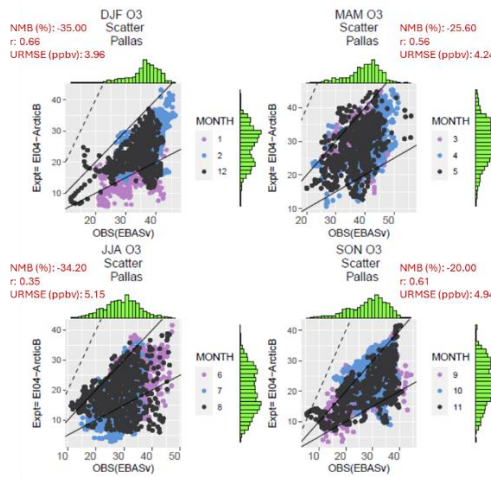

DEHM vs. EBAS

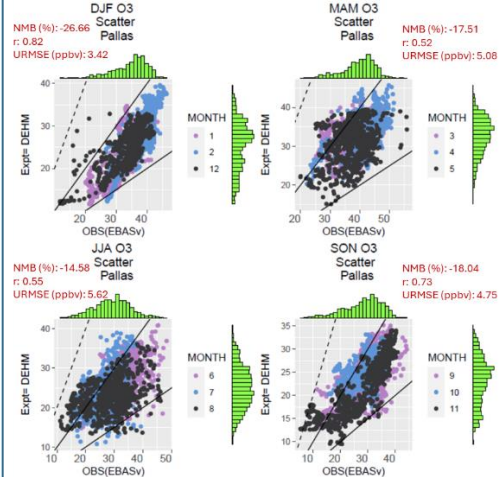

G-M vs. EBAS

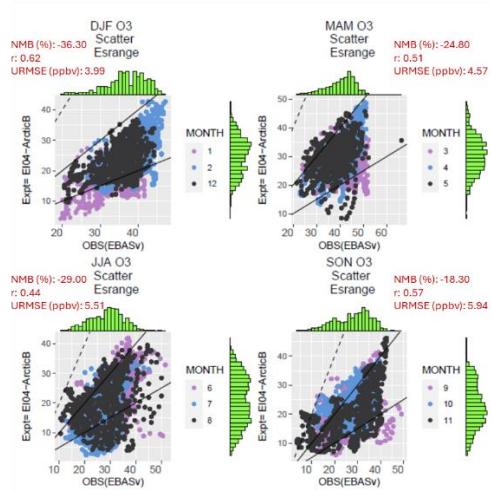

DEHM vs. EBAS

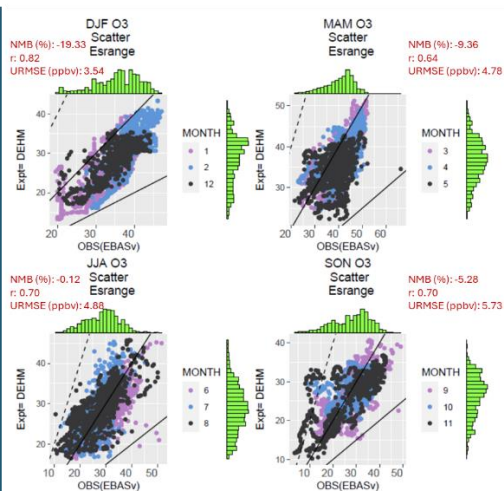

G-M vs. EBAS

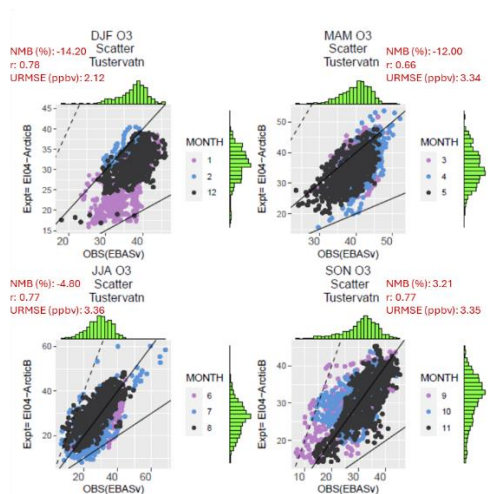

DEHM vs. EBAS

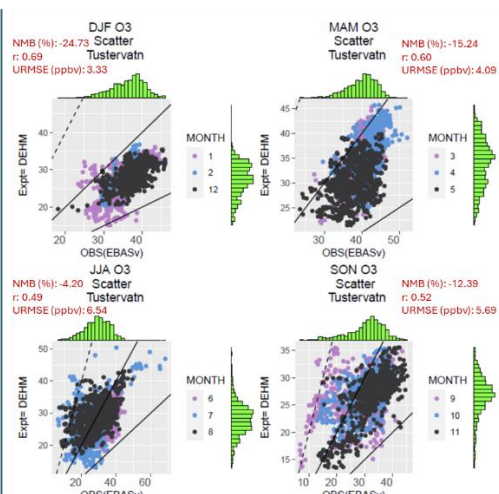

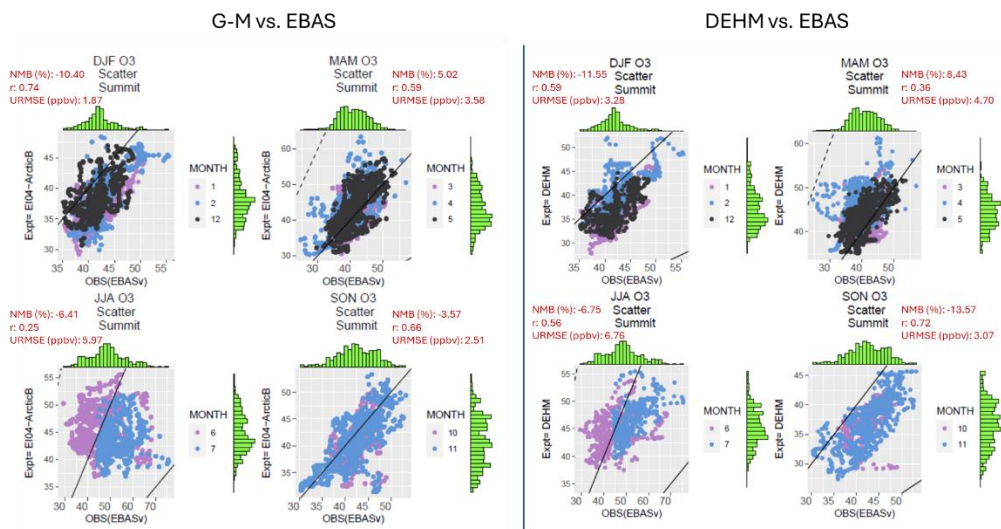

**Figure S3.** Seasonal statistical evaluation (NMB, R, URMSE) based on 2015 hourly model and observational O<sub>3</sub> data at Arctic surface sites for GEM-MACH and DEHM, respectively.

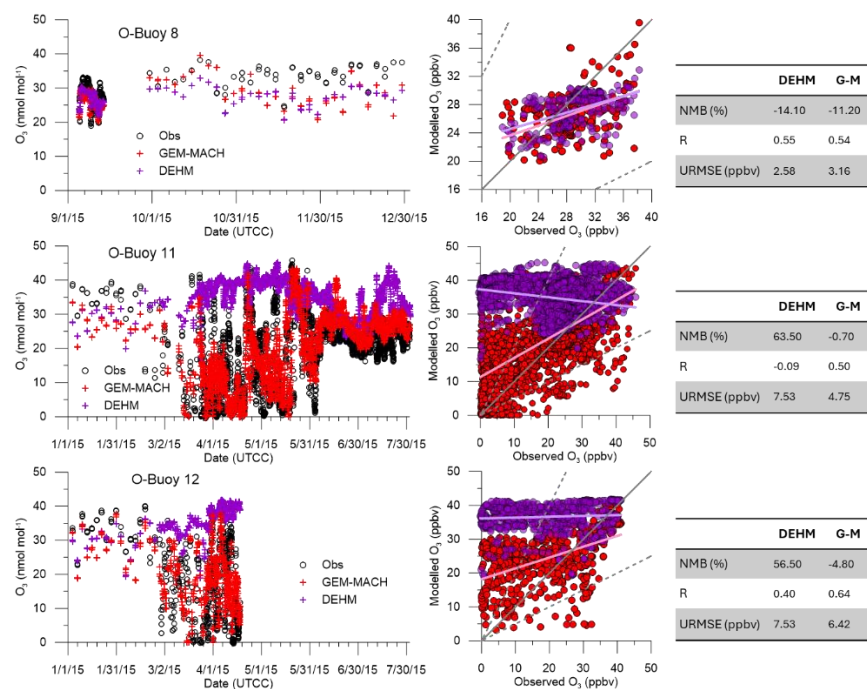

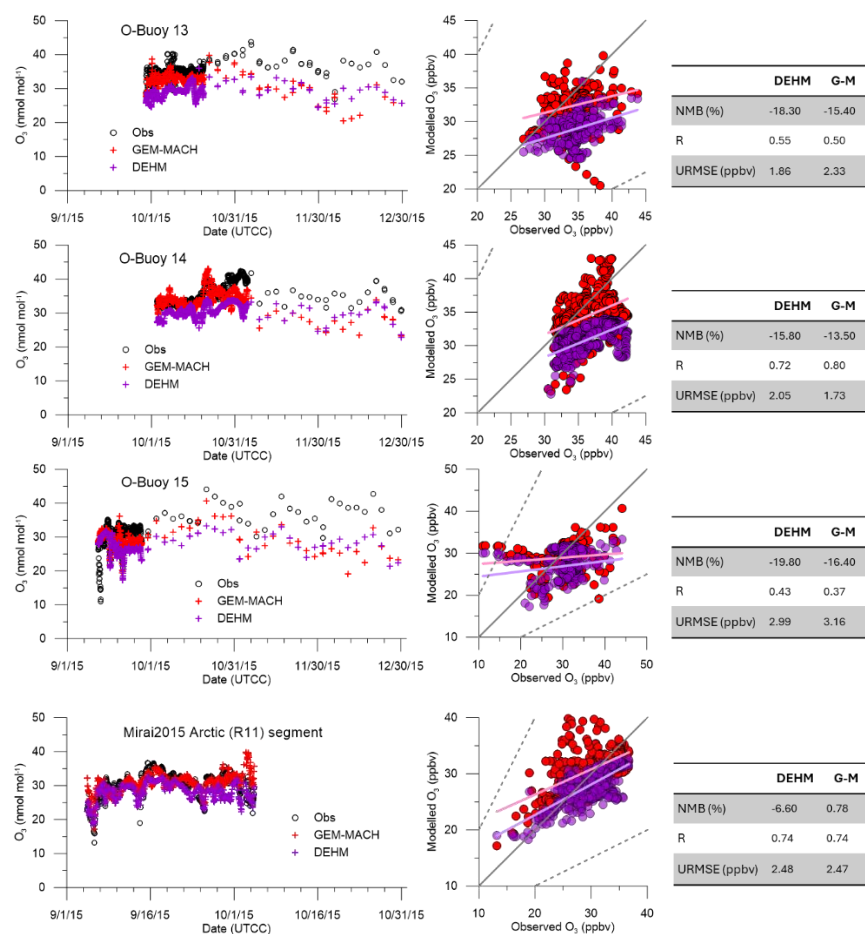

**Figure S4.** O<sub>3</sub> time series comparison between model and observation for individual O-buoy deployment and Mirai cruise during 2015.

Alert

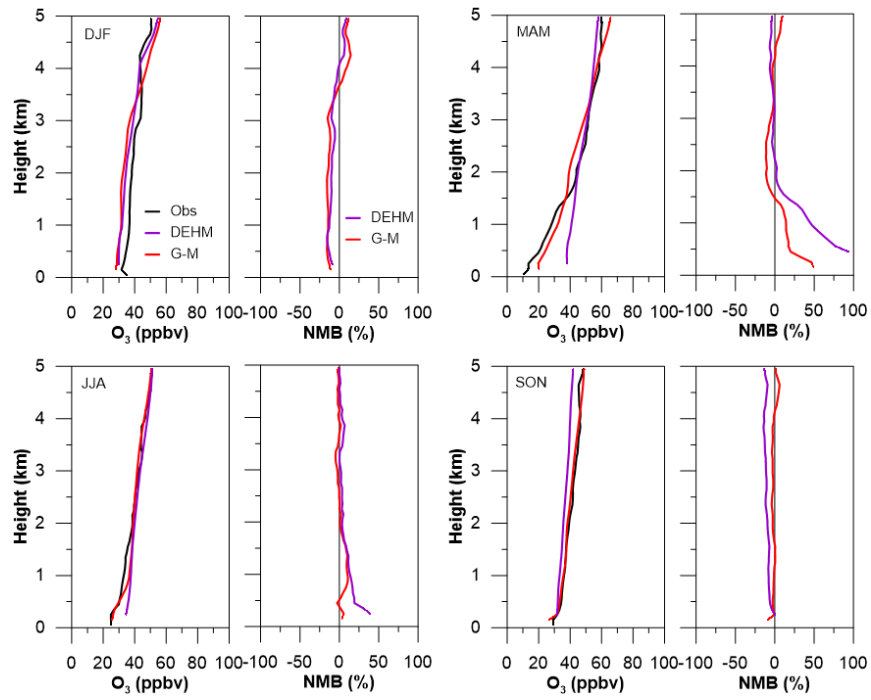

Eureka

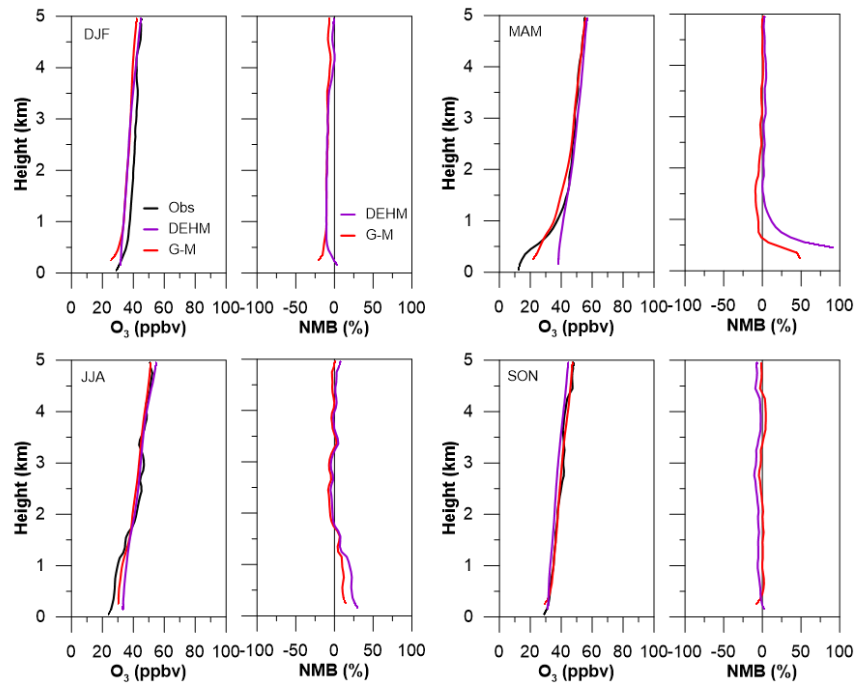



## Resolute

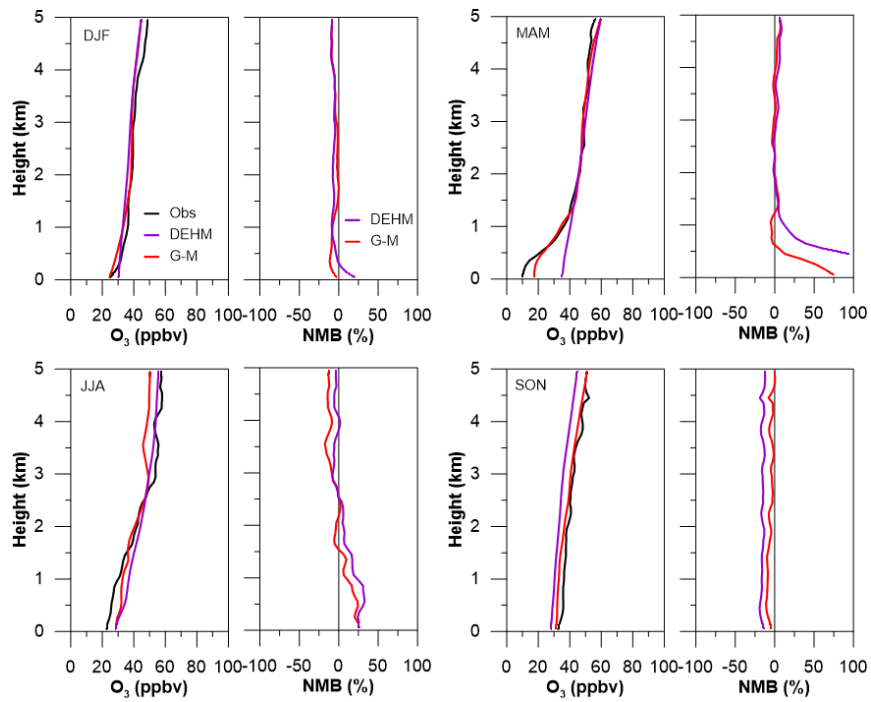

## Ny Alesund

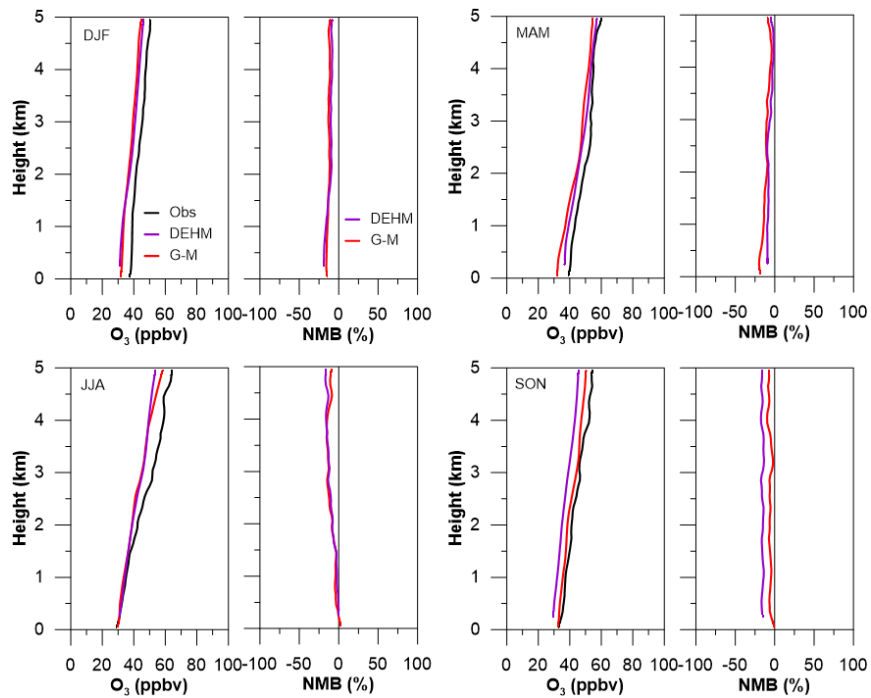

### Scoresbysund

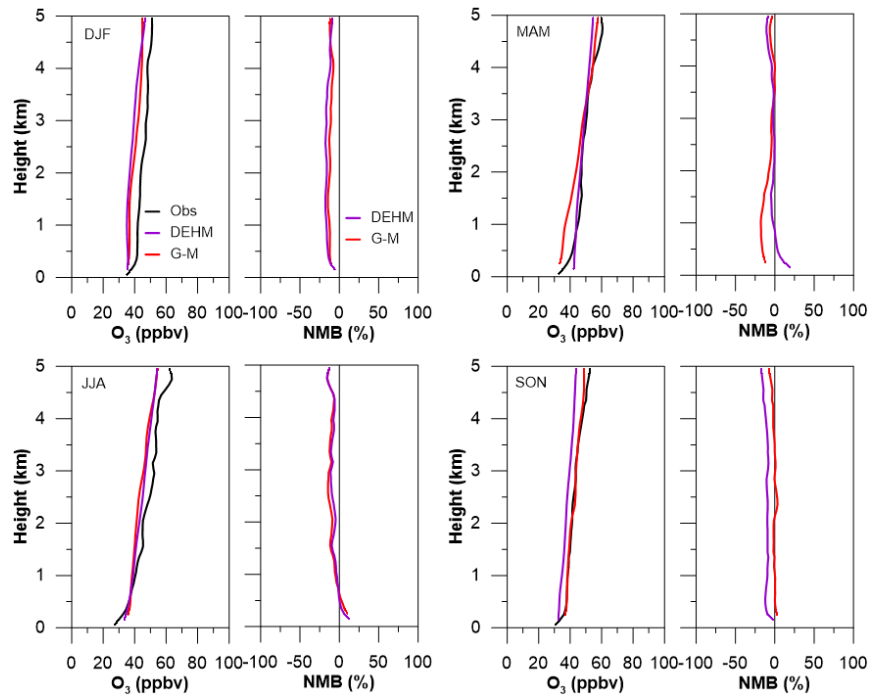

### Sodankyla

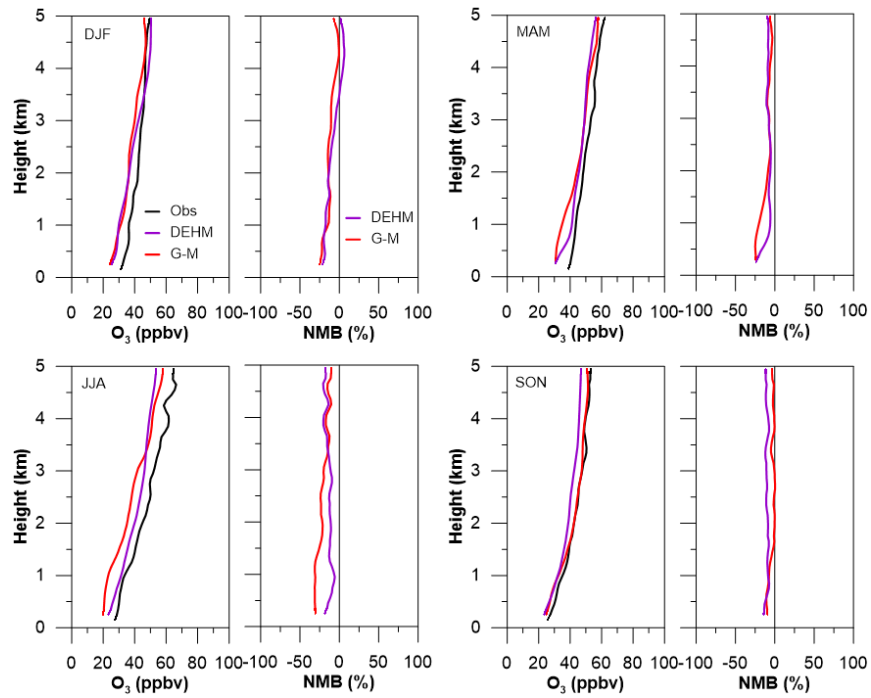

**Figure S5.** Comparison of modelled and observed O<sub>3</sub> profiles (seasonal averaged) over the lowest 5 km of the atmosphere at 6 Arctic ozonesonde sites: Alert, Eureka, Resolute, Ny Ålesund, Scoresbysund, and Sodankylä. Both measurement and modelled profiles are interpolated at 10-m resolution and binned to 100-m intervals.

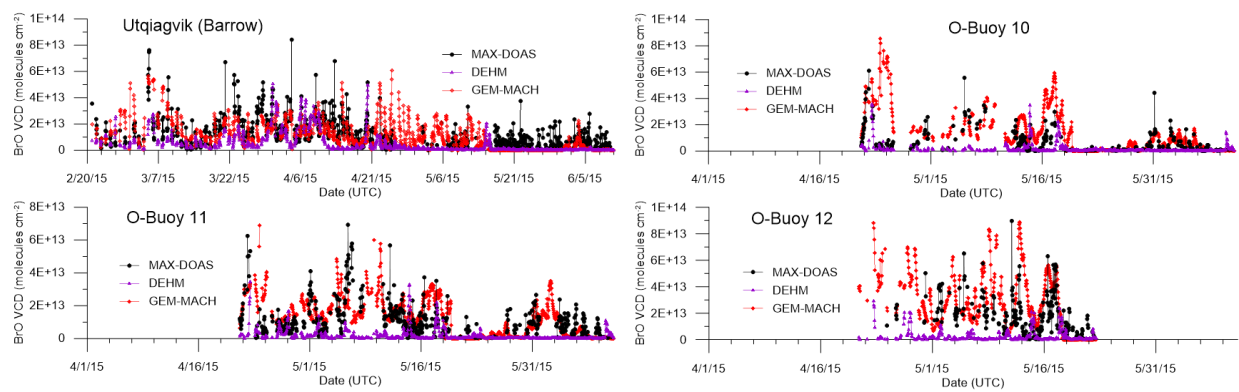

**Figure S6.** Comparison of modelled BrO (GEM-MACH in red, DEHM in purple) against MAX-DOAS observations (black) at Utqiagvik and on O-buoys during 2015.

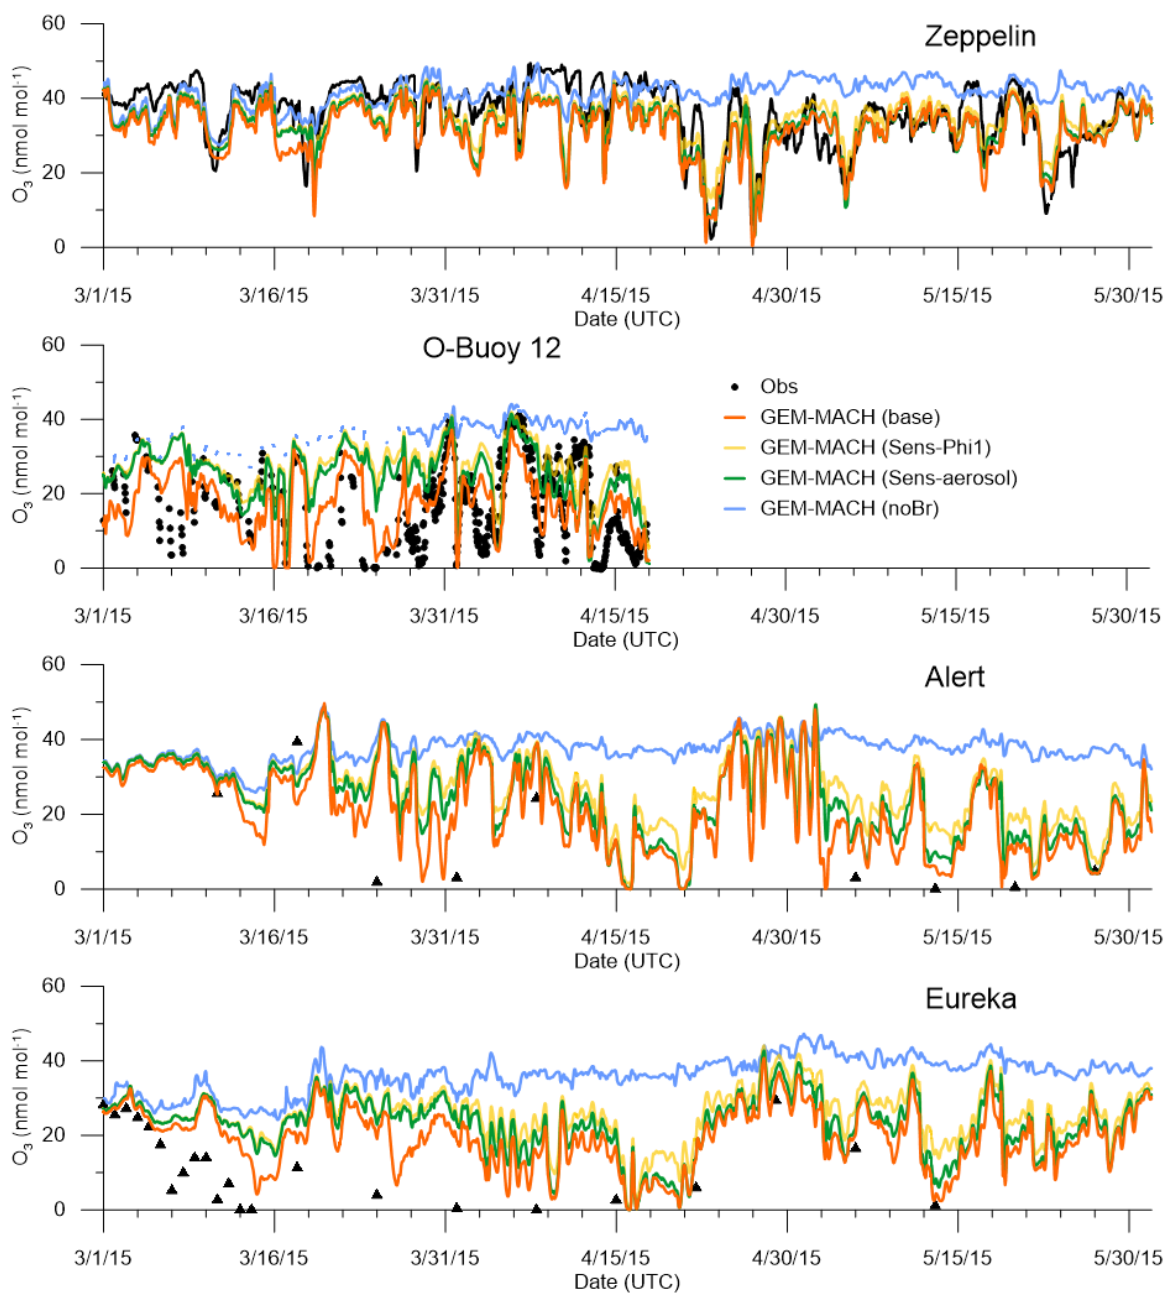

**Figure S7.** GEM-MACH simulated O<sub>3</sub> time series from the base (red) and sensitivity runs, Sens-Phi1 (turquoise) and Sens-aerosol (green), compared with observations (black) over Beaufort Sea (O-Buoy 12) and at coastal sites: Zeppelin, Alert, and Eureka. Also plotted are the modelled O<sub>3</sub> timeseries from the No-bromine run (blue).

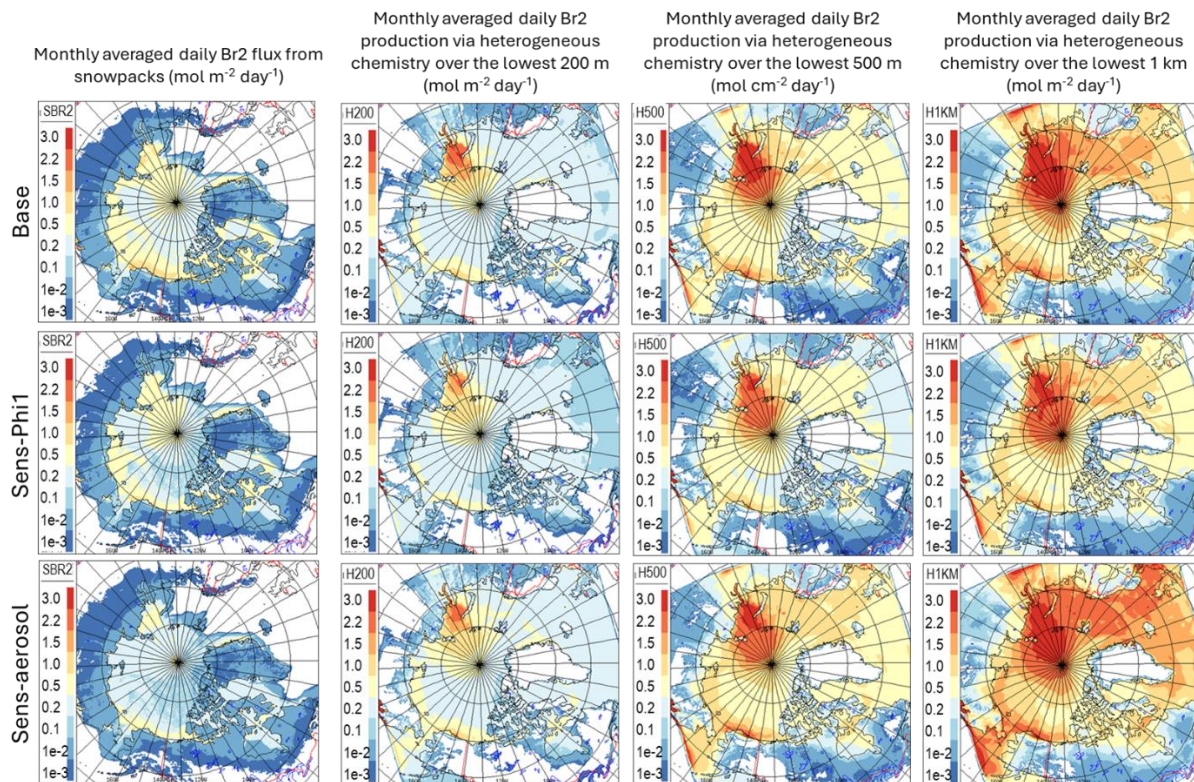

**Figure S8.** GEM-MACH modelled monthly mean (2015 April)  $\text{Br}_2$  daily flux from snowpacks (leftmost column) and  $\text{Br}_2$  daily production from aerosol heterogeneous reaction over the lowest 200 m (2nd column from left), the lowest 500 m (3rd column from left), and the lowest 1 km (rightmost column), all in  $\text{moles m}^{-2}$ , from the base (top), Sens-Phi1 (middle), and Sens-aerosol runs (bottom).



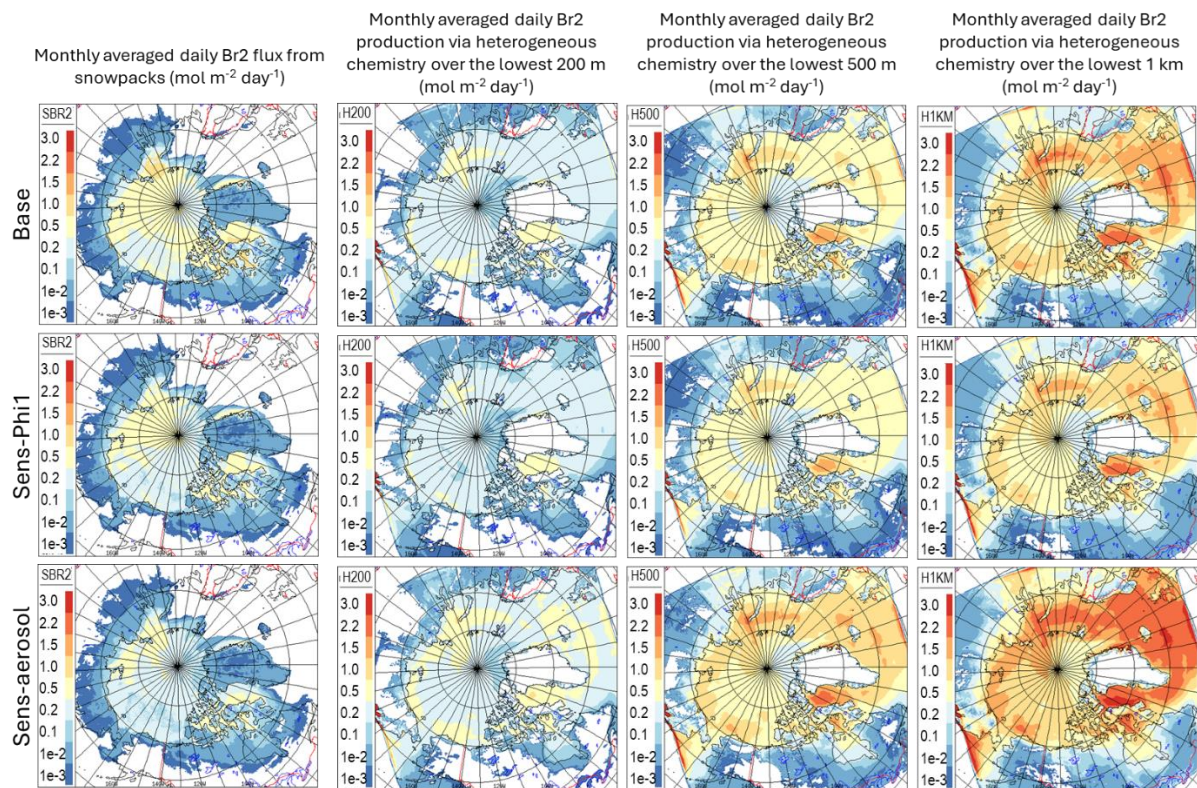

**Figure S9.** Same as SF.8 but for 2015 May.



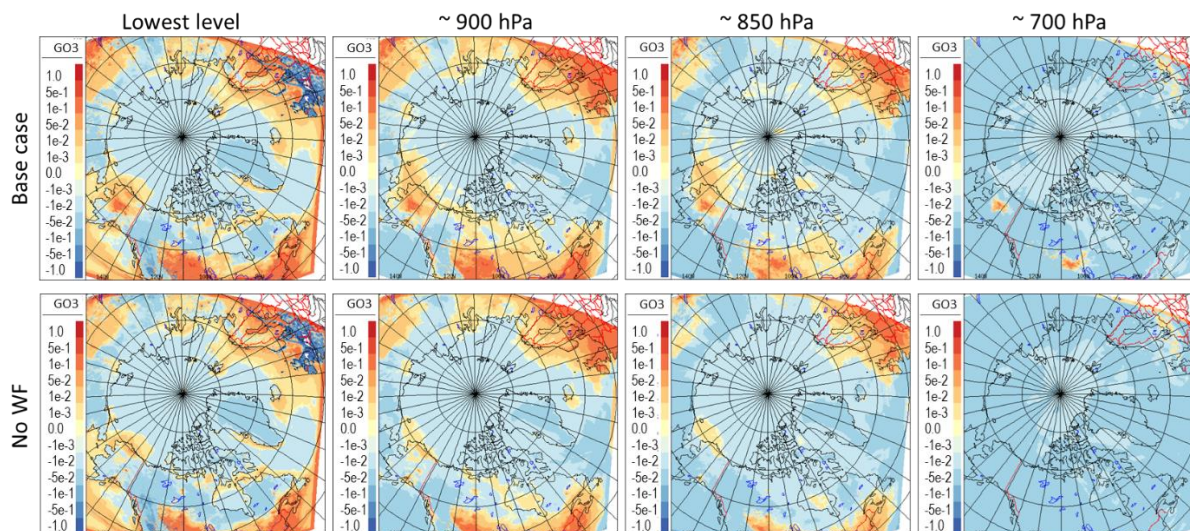

**Figure S10.** July monthly net O<sub>3</sub> chemical tendency (in μg/kg/900s) at model levels (from left to right): lowest surface level, ~ 900 hPa, ~850 hPa, and ~ 700 hPa, from the GEM-MACH base annual simulation (with wildfires) (top row) and the GEM-MACH simulation without the wildfire emissions in the model LAM domain (bottom row).

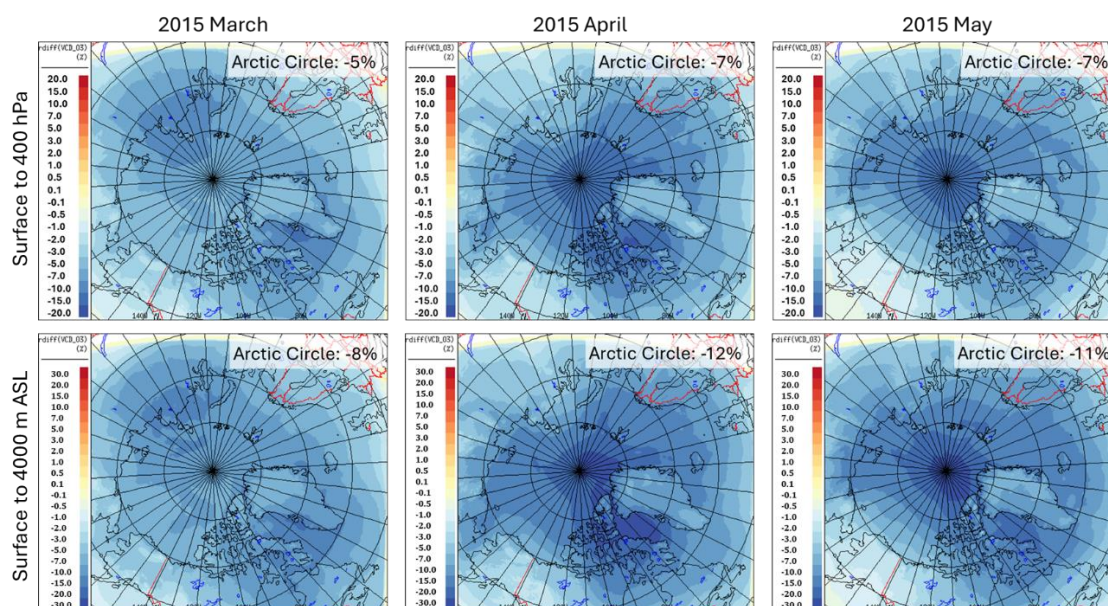

**Figure S11.** Reduction in monthly mean O<sub>3</sub> partial columns due to snowpack bromine in GEM-MACH, surface to 400 hPa (top row) and surface to 4000 m ASL (bottom row), shown in relative difference (%): (Base-noBr)/noBr\*100. The corresponding reductions in pan-Arctic (> 66.5°N; “Arctic Circle”) integrated monthly mean O<sub>3</sub> partial columns due to snowpack bromine are indicated in each plot.
